# Supplementary material for: STIM1‐mediated calcium influx controls antifungal immunity and the metabolic function of non‐pathogenic Th17 cells
Source: PubMed Central journal article supplement (PMC7411566; doi:10.15252/emmm.201911592), 2020-07-01
Supplement: EMMM-12-e11592-s001.pdf [file EMMM-12-e11592-s001.pdf]

## APPENDIX

### Table of contents

1. Case reports
2. Legends to Appendix Figures S1-5
3. Appendix Tables S1-2
4. Appendix Figures S1-5
5. Appendix Table S3

### 1. CASE REPORTS

**Patient 1 (STIM1 p.L374P).** P1 (A-II-1) was born to parents who are second cousins. He first came to medical attention in the first few weeks of life. His clinical phenotype was notable for anhidrotic ectodermal dysplasia characterized by sparse hair, the inability to sweat, intolerance of warm temperatures and dystrophic nails with no evidence of fungal infection. Consistent with ectodermal dysplasia, the teeth were fragile and crumbling on eruption prompting the diagnosis of amelogenesis imperfecta. Eye abnormalities noted early after birth included non-reactive pupils and the absence of sphincter muscles in the iris with a unifying diagnosis of partial iris hypoplasia. Features of severe myopathy were noted early in life with a positive Gower's sign and muscle weakness that was worse proximally. Sensation and reflexes as well as nerve conduction tests were normal. A muscle biopsy revealed a paucity of type 2 fibres. Since his early 20's, P1 had significant cachexia with a BMI of 13.1. He required a cane to ambulate, and was unable to sit up from the examination bench unassisted.

Clinical symptoms of immunodeficiency began in early life with recurrent sinopulmonary infections as well as severe primary varicella infection with features of encephalitis and the development of new pox lesions for 4 weeks after infection onset. P1 suffered from recurrent pneumonias culminating in the development of severe bronchiectasis with clubbing. Organisms implicated in his chronic lung infections included *Mycobacterium heckeshornense*, *Pseudomonas aeruginosa*, and methicillin resistant *Staphylococcus aureus*. Laboratory testing supported the diagnosis of combined immunodeficiency (CID) with normal numbers of circulating lymphocytes and T, B and NK cells for age (**Supplemental Table 2**). Serum immunoglobulins were low-normal (although the patient did go on to receive immunoglobulin replacement, which reduced the number of infections) and he was able to generate detectable antibody titers against both tetanus and diphtheria vaccine and blood group antigens. Lymphocyte proliferation tests showed a normal response to phytohemagglutinin (PHA), pokeweed mitogen and *S. aureus* Cowan Protein A, whereas responses to varicella zoster virus, Herpes simplex virus (HSV), rubella, mumps, measles, CMV, and *C.* antigens were absent. At 23 y/o, P1 developed EBV-associated lymphoproliferative disease most consistent with a large B cell lymphoma, which presented as a masseter muscle mass. He was started on rituximab single

agent chemotherapy. Following 4 doses of single agent chemotherapy with rituximab, clinical remission was achieved for 9 months, after which his EBV viral load increased, as did his lymphadenopathy. He was treated with another 4 rounds of rituximab, with no clinical improvement. P1 passed away at 25 y/o while enrolled in palliative care from respiratory failure due to acute pneumonia, secondary to chronic lung disease and myopathy.

**Patient 2 (STIM1 p.L374P).** P2 (A-II-2) is the sister of P1. Two weeks after birth, she was diagnosed with mydriasis as a consequence of a bilateral partial aniridia cumulating in severe photophobia. She further exhibited delayed motor development and poor head control with hypotonia in her first years of life. At 6 y/o, P2 suffered from a proximal muscle weakness as part of a non-specific myopathy, which was confirmed by decreased motor units with polyphasic low amplitudes and short durations in EMG measurements. A muscle biopsy from the left biceps muscle at 6 y/o revealed a predominance of type I muscle fibers and a type II muscle fiber atrophy. In addition to hypotonia, P2 further showed signs of anhidrotic ectodermal dysplasia (EDA) with sparse and thin hair, dry skin, profound anhidrosis, and enamel hypoplasia. In addition, P2 presented with arachnodactyly with hyperextensibility and swollen DIPs of the right hand during later stages of the disease (~ 7 y/o).

Signs of immunodeficiency were apparent within the first years of P2's life when she started to develop recurrent typical pneumonias, maxillary and left ethmoidal sinusitis, purulent rhinitis and a left otitis media leading to a mild-to-moderate middle ear deafness during the later disease course. Physical examinations revealed seborrheic dermatitis and recurrent monilial rashes (thrush) caused by *Candida* species. Ultrasound revealed enlarged cervical lymph nodes and hepatosplenomegaly. A liver biopsy taken at 6 y/o appeared unsuspecting. Laboratory analyses showed a microcytic hypochromic anemia. Immunoglobulin levels for IgM, IgG, IgA and IgE at 7 y/o were normal. At 28 y/o, IgM (247 mg/dL), IgA (195 mg/dL) and IgG (762 mg/dL) remained in the normal range (**Supplemental Table 2**). However, antibody titers following rubella vaccination never increased sufficiently. A chest X-ray revealed hyperinflated lungs in line with broncho-obstruction during childhood asthma. P2 was started on a treatment with inhaled steroids that evoked *Candida* skin infections including severe onychomycosis. However, lung function testing during the later disease course using a rapid acting beta-2 agonist disproved the suspected diagnosis of allergic asthma. Sarcoidosis was excluded by negative testing for angiotensin converting enzyme (ACE) and X-rays. At 26 y/o, P2 was diagnosed with Crohn's disease and treated with Remicade infusions. Upon TNF- $\alpha$  blockade P2 exhibited onychomycosis and recurrent left-sided urolithiasis complicated by urosepsis induced by *Clostridium difficile*. At 6 y/o, P2 presented with a failure to thrive, malabsorption, hypercholesterinemia, hypertriglyceridemia, and steatorrhea. Chymotrypsin testing and negative  $\alpha$ -Gliadin-IgA-antibodies excluded endocrine pancreas dysfunction and coeliac disease. While esophagogastroduodenoscopy showed no abnormalities, secretin-pancreozymin stimulation revealed an exocrine pancreas dysfunction. Laboratory analyses revealed decreased

HDL and lipoprotein A levels, whereas lipoprotein B were elevated. Parathyroid hormone (PTH) and blood  $\text{Ca}^{2+}$  levels were increased and were accompanied by hypercalciuria and nephrolithiasis. Multiple Endocrine Neoplasia (MEN) syndrome was excluded based on normal thyroid-stimulating hormone (TSH) blood levels and Addison's disease was disproved by an unsuspecting adrenocorticotrophic hormone (ACTH) stimulation test. At 28 y/o, P2 gave birth to a healthy boy at 36 weeks of gestation. Delivery was via Cesarean section due to HPV infection and perianal disease, both related to Crohn's disease and Remicade therapy. P2 breastfed normally until at least 3 months of age.

## 2. APPENDIX FIGURE LEGENDS

**Appendix Figure S1. Abolished SOCE in T cells of patients with STIM1 p.L374P mutation. (A)** STIM1 protein expression in fibroblasts of a healthy donor (HD) and a patient homozygous for a STIM1 p.E128RfsX9 null mutation reported previously(34). Representative histograms show staining of fixed and permeabilized fibroblasts with a polyclonal antibody against the C terminus of STIM1. Bar graphs show the mean fluorescence intensity (MFI) of STIM1 subtracted by the MFI of isotype IgG staining. The resulting delta MFI ( $\text{MFI}_{\text{STIM1}} - \text{MFI}_{\text{IgG}}$ ) of HD cells was set to 1. Data are the mean  $\pm$  SEM from 2 independent experiments. \*\*\*  $p < 0.001$ . **(B)** Human T cells of P1 (red), P2 (blue), their mother (grey) and HD (black) were cultured *in vitro* for 6 weeks and analyzed for  $\text{Ca}^{2+}$  levels after stimulation with 1  $\mu\text{M}$  thapsigargin (TG) (at 120s) in  $\text{Ca}^{2+}$  free Ringer's solution to deplete intracellular  $\text{Ca}^{2+}$  stores followed by addition of 1 mM  $\text{Ca}^{2+}$  to induce SOCE (at 400s). Traces represent the mean  $\pm$  SEM from two measurements.

**Appendix Figure S2. No proliferation defect of STIM1 p.L374P T cells cultured *in vitro*.** **(A,B)** Proliferation of  $\text{CD4}^+$  **(A)** and  $\text{CD8}^+$  **(B)** T cells of P1, P2, their mother and a HD control that were stimulated *in vitro* for 6 weeks with PHA (1  $\mu\text{g}/\text{ml}$ ) in the presence of irradiated buffy coat cells (PBMC : feeder cell ratio of 1:1), EBV-transformed B cells (PBMC : B cell ratio of 1:10) and IL-2 (50 U/ml), loaded with CFSE and restimulated with anti-CD3 and anti-CD28 in the presence or absence of 1  $\mu\text{M}$  FK506 for 1, 2 and 3 days *in vitro*. Histograms show the dilution of CFSE in T cells of P1 (red), P2 (blue), their mother (grey) and a HD (black) on day 0 (filled gray histograms) and day 1, 2, 3 of stimulation. One representative experiment of two is shown.

**Appendix Figure S3. Impaired cytokine production by T cells of STIM1 p.L374P patients.** **(A)** Frequencies of  $\text{CD3}^+$ ,  $\text{CD4}^+$  and  $\text{CD8}^+$  T cells among T cell of P1, P2, their mother and a HD control that were stimulated *in vitro* for 6 weeks with PHA (1  $\mu\text{g}/\text{ml}$ ) in the presence of irradiated buffy coat cells (PBMC : feeder cell ratio of 1:1), EBV-transformed B cells (PBMC : B cell ratio of

1:10) and IL-2 (50 U/ml). **(B)** Frequencies of IL-2, IFN- $\gamma$  and IL-17A expressing CD4<sup>+</sup> and CD8<sup>+</sup> T cells of patients and controls after restimulation with PMA and ionomycin for 6 hours and analyzed by flow cytometry. **(C,D)** Human T cells from two healthy donors, P1 and his mother were cultured in the continuous presence of *C. albicans* and IL-2 for 2-4 weeks. T cells were restimulated with PMA and ionomycin for 6 h and analyzed for IL-2, IFN $\gamma$  and TNF $\alpha$  production. Bar graphs represent the mean  $\pm$  SEM from two independent experiments. Statistical analysis by one-way ANOVA. \*\*\*p<0.001.

**Appendix Figure S4. Comparable neutrophil frequencies in the bone marrow of WT and *Stim1<sup>fl/fl</sup> Cd4Cre* mice.** **(A)** Detection of CD11b<sup>+</sup> and Ly-6G<sup>+</sup> neutrophils in the bone marrow of WT and *Stim1<sup>fl/fl</sup> Cd4Cre* mice. **(B)** Bar graphs show the frequencies of Cd11b<sup>hi</sup> Ly-6G<sup>hi</sup>, Cd11b<sup>int</sup> Ly-6G<sup>lo</sup> and Cd11b<sup>int</sup> Ly-6G<sup>hi</sup> neutrophil subsets from 4-6 mice per genotype and 2 repeat experiments.

**Appendix Figure S5. Normal glycolysis, OXPHOS and mTOR signaling in STIM1-deficient T cells cultured *in vitro*.** **(A,B)** Analysis of the extracellular acidification rate (ECAR, in mpH/min) of human T cells that were stimulated *in vitro* for 6 weeks with PHA (1  $\mu$ g/ml) in the presence of irradiated buffy coat cells (PBMC : feeder cell ratio of 1:1), EBV-transformed B cells (PBMC : B cell ratio of 1:10) and IL-2 (50 U/ml) from P1 (red), P2 (blue), their mother (grey) and a HD (black). Cells were sequentially treated with 25 mM glucose, 5  $\mu$ M oligomycin and 100 mM 2-DG. **(A)** ECAR traces summarized from 3 independent experiments are shown. **(B)** Bar graphs represent data from A analyzed for glycolysis (after glucose addition), glycolytic capacity, glycolytic reserve and non-glycolytic acidification  $\pm$  SEM of 3 repeat experiments. **(C,D)** Analysis of oxygen consumption rate (OCR, in pmol/min) of expanded T cells from patients and controls as in A. Cells were sequentially treated with 1  $\mu$ M oligomycin, 1.5  $\mu$ M FCCP and 100 nM rotenone / 1  $\mu$ M antimycin. **(C)** OCR traces summarized from 3 independent experiments are shown. **(D)** Bar graphs represent data from C analyzed for basal and maximal respiration, spare respiratory capacity (SRC), coupling efficiency and ATP production. Traces and bar graphs in A-D represent the mean  $\pm$  SEM of 3 repeat experiments. **(E,F)** Analysis of mTOR and p70S6 phosphorylation in CD4<sup>+</sup> and CD8<sup>+</sup> T cells of P1 (red), P2 (blue), their mother (grey) and a HD (black) that were stimulated *in vitro* for 6 weeks with PHA (1  $\mu$ g/ml) in the presence of irradiated buffy coat cells (PBMC : feeder cell ratio of 1:1), EBV-transformed B cells (PBMC : B cell ratio of 1:10) and IL-2 (50 U/ml), restimulated with anti-CD3/CD28 for 24 hours, left unstimulated or stimulated. Histograms represent intracellular staining of cells with anti-phospho-mTOR (Ser2448) **(E)** and anti-phospho-p70S6 (Ser235/236) **(F)** antibodies. Filled gray histograms represent unstimulated cells. Gates indicate the frequencies of CD4<sup>+</sup> and CD8<sup>+</sup> T cells positive for phospho-mTOR and phospho-p70S6 staining.

| Patient                                                            | P1 (A-II-1)             |                       | P2 (A-II-2)      |                |                              |
|--------------------------------------------------------------------|-------------------------|-----------------------|------------------|----------------|------------------------------|
| STIM1 mutation                                                     | p.L374P                 |                       | p.L374P          |                |                              |
| Age                                                                | 11 y/o                  | 22 y/o                | 7 y/o            | 10.5 y/o       | 28 y/o                       |
| <b>Immune cell populations</b><br>(in x10 <sup>9</sup> /μl)        |                         |                       |                  |                |                              |
| Granulocytes                                                       | <b>15.61</b> [1.5-5.6]  | <b>6.98</b> [2-6]     | WBC normal       | 4.08 [1.5-5.6] |                              |
| Monocytes                                                          | <b>1.72</b> [< 0.5]     | <b>1.00</b> [0.1-0.8] |                  | 0.47 [<0.5]    |                              |
| Eosinophils                                                        | 0.9 [< 0.8]             | 0.19 [0-0.45]         |                  | 0.13 [<0.8]    |                              |
| Basophils                                                          | 0.04 [< 0.2]            | 0.06 [0-0.1]          |                  | 0.05 [<0.2]    |                              |
| Lymphocytes                                                        | 1.81 [0.9-3.5]          | 1.27 [1-4]            |                  | 1.95 [1.4-4.1] |                              |
| T cells                                                            |                         |                       | normal           |                |                              |
| CD3 <sup>+</sup>                                                   | 1.38 [0.80-3.50]        | 0.91 [0.7-2.1]        |                  |                |                              |
| CD4 <sup>+</sup>                                                   | 1.03 [0.40-2.10]        | 0.58 [0.41-1.33]      |                  |                |                              |
| CD8 <sup>+</sup>                                                   | 0.30 [0.20-1.20]        | 0.29 [0.2-0.78]       |                  |                |                              |
| B cells (CD19 <sup>+</sup> )                                       | 0.37 [0.2-0.6]          | 0.22 [0.1-0.5]        | 0.84 [0.18-1.52] |                |                              |
| NK cells (CD3 <sup>-</sup> CD16 <sup>+</sup> CD56 <sup>+</sup> )   | 0.04                    | 0.09 [0.09-0.6]       |                  |                |                              |
| NK T cells (CD3 <sup>+</sup> CD16 <sup>+</sup> CD56 <sup>+</sup> ) |                         | 0.03                  |                  |                |                              |
| <b>Lymphocyte proliferation</b><br>cpm (s.i.)                      |                         |                       | normal           |                |                              |
| PHA                                                                | <b>5,514 (65)</b>       | <b>2,686</b>          |                  |                |                              |
| Pokeweed Mitogen                                                   | 17,044 (201)            | 2,729                 |                  |                |                              |
| S. aureus Cowan, Protein A                                         | 1,218 (12)              | 568                   |                  |                |                              |
| Candida albicans                                                   | <b>31 (0)</b>           | <b>489 (2)</b>        |                  |                |                              |
| Cytomegalovirus                                                    | <b>28 (0)</b>           | <b>591 (3)</b>        |                  |                |                              |
| Herpes simplex                                                     | <b>91 (1)</b>           | 1,812 (8)             |                  |                |                              |
| Measles                                                            | <b>344 (2)</b>          | <b>702 (3)</b>        |                  |                |                              |
| Mumps                                                              | <b>187 (1)</b>          | <b>584 (3)</b>        |                  |                |                              |
| Rubella                                                            | <b>60 (0)</b>           | <b>422 (2)</b>        |                  |                |                              |
| Varicella Zoster                                                   | 4,872 (28)              | 847 (4)               |                  |                |                              |
| <b>Serum Ig</b>                                                    |                         |                       |                  |                |                              |
| IgM (g/L)                                                          | 0.54 [0.35-2.39]        |                       | normal           |                | 247 mg/dL<br>(40-230mg/dL)   |
| IgG (g/L)                                                          | <b>5.80</b> [7.59-15.5] |                       | normal           |                | 762 mg/dL<br>(700-1600mg/dL) |
| IgA (g/L)                                                          | 3.63 [0.58-3.59]        |                       | normal           |                | 195 mg/dL<br>(70-400mg/dL)   |
| IgE (μg/L)                                                         | 1 [32]                  |                       | normal           |                | normal                       |
| Diphtheria antibody                                                | 0.03 U/mL (low)         |                       |                  |                |                              |
| Tetanus antibody                                                   | 0.06 U/mL (low)         |                       |                  |                |                              |
| Rubella antibody                                                   |                         |                       |                  | negative       |                              |

**Appendix Table S1:** Immune cell populations and functions of P1 and P2. cpm, counts per minute; Ig, Immunoglobulin. Results for P1 (11 y/o) reported as cpm and stimulation index (s.i.) which represents the ratio of cpm of the stimulated lymphocytes to the mean cpm of an unstimulated control. Reference values in [ ].

| <b>Anti-human antibodies</b> |                     |              |                    |
|------------------------------|---------------------|--------------|--------------------|
| <b>Antigen</b>               | <b>Manufacturer</b> | <b>Clone</b> | <b>Conjugation</b> |
| CD3                          | Biolegend           | SK7          | APC-Cy7            |
| CD3                          | Biolegend           | UCHT1        | Alexa700           |
| CD4                          | Biolegend           | OKT4         | BV510              |
| CD4                          | Biolegend           | RPA-T4       | PE, PE-Cy7         |
| CD4                          | BioLegend           | OKT4         | Alexa700           |
| CD8                          | Biolegend           | HIT8a        | Alexa700           |
| CD8                          | Biolegend           | RPA-T8       | PE-Cy7             |
| CD8                          | Biolegend           | SK1          | Pacific-Blue       |
| CD45RO                       | BD Pharmingen       | UCHL1        | PE-Cy7             |
| CD45RO                       | Biolegend           | UCHL1        | APC-Cy7            |
| CD44                         | Biolegend           | IM7          | PerCP              |
| CD57                         | Biolegend           | HCD57        | Pacific-Blue       |
| CD16                         | Biolegend           | 3G8          | Alexa488           |
| CD56                         | Biolegend           | HCD56        | PerCP-Cy5.5        |
| CD27                         | Biolegend           | O323         | PE-Cy7             |
| CCR7                         | R&D                 | 150503       | FITC               |
| HLA-DR                       | Biolegend           | L243         | APC-Cy7            |
| Va24Ja18 TCR                 | Biolegend           | 6B11         | APC                |
| Foxp3                        | BioLegend           | 259D         | PE                 |
| IL-2                         | Biolegend           | MQ1-17H12    | Alexa700, APC      |
| IL-22                        | eBioscience         | 22URT1       | eF710              |
| TNF- $\alpha$                | Biolegend           | MAb11        | A488               |
| IL-17A                       | eBioscience         | eBio64CAP17  | PE                 |
| IFN- $\gamma$                | eBioscience         | 4S.B3        | Alexa488           |
| $\gamma\delta$ TCR           | BD                  | B1           | biotinylated       |
| +streptavidin                | Biolegend           | -            | BV605              |
| ViabDye                      | eBioscience         | -            | eF506              |
| Phopsho mTor Ser2448         | eBioscience         | MRRBY        | eFluor660          |
| Phospho S6 Ser235/236        | eBioscience         | cupk43k      | APC                |
| <b>Anti-mouse antibodies</b> |                     |              |                    |
| <b>Antigen</b>               | <b>Manufacturer</b> | <b>Clone</b> | <b>Conjugation</b> |
| CD4                          | eBioscience         | GK1.5        | PE-Cy7, eFluor450  |
| CD44                         | eBioscience         | IM7          | Pacific-Blue, FITC |
| IL-2                         | eBioscience         | JES6-5H4     | FITC               |
| IFN- $\gamma$                | eBioscience         | XMG1.2       | APC, PE            |
| TNF- $\alpha$                | eBioscience         | MP6-XT22     | APC                |
| IL-17A                       | eBioscience         | eBio17B7     | APC                |
| IL-17A                       | Biolegend           | TC11-18H10.1 | FITC               |
| IL-17F                       | eBioscience         | eBio18F10    | PerCP eFluor710    |
| GM-CSF                       | Biolegend           | MP1-22E9     | PerCP-Cy5.5        |
| CD45                         | Biolegend           | 30-F11       | PE-Cy7             |
| MHC-II                       | eBioscience         | M5/114.15.2  | eFluor450          |
| Cd11b                        | eBioscience         | M1/70        | APC                |
| Gr-1 (Ly6G)                  | eBioscience         | RB6-8C5      | PE                 |
| Gr-1 (Ly6G)                  | Biolegend           | 1A8          | AlexaFluor647      |

**Appendix Table S2:** Commercial antibodies used for flow cytometry.

A

Human fibroblasts

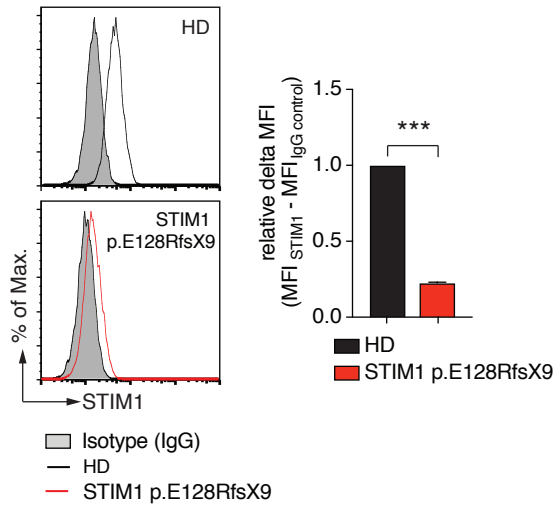

B

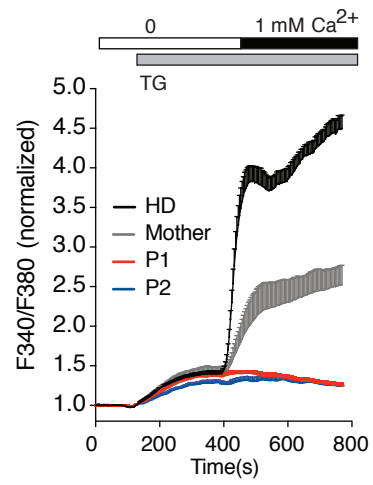

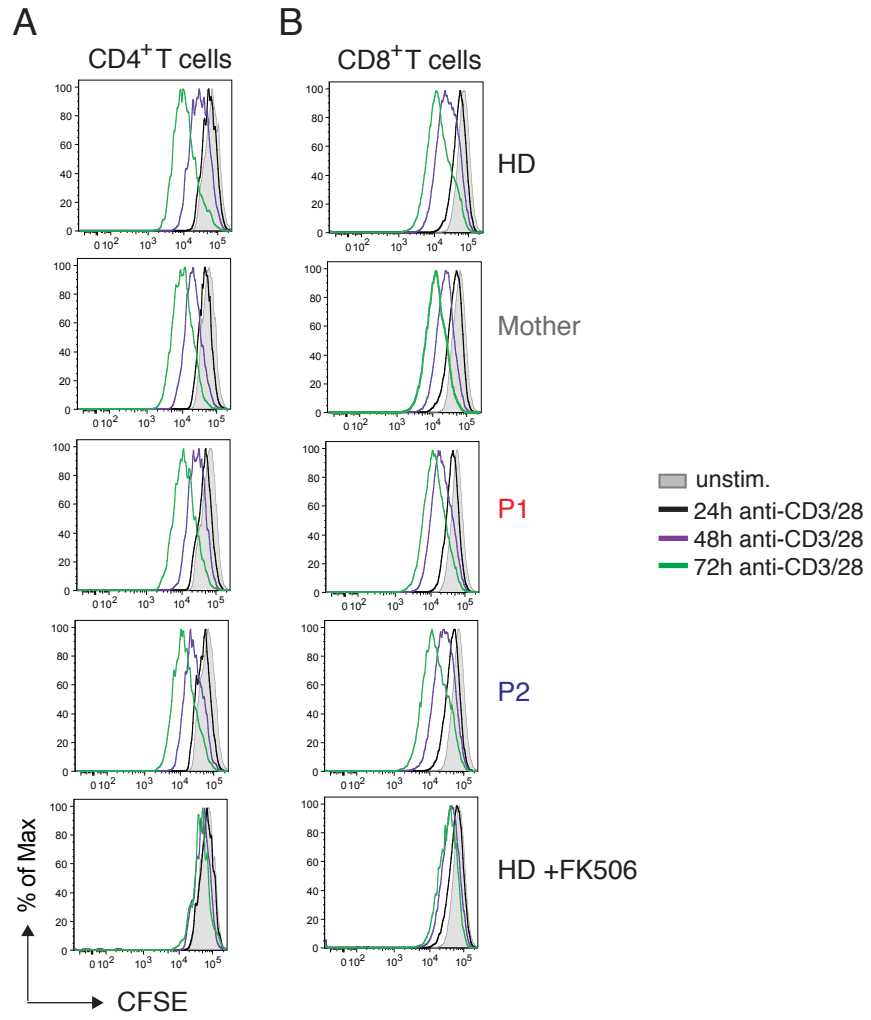



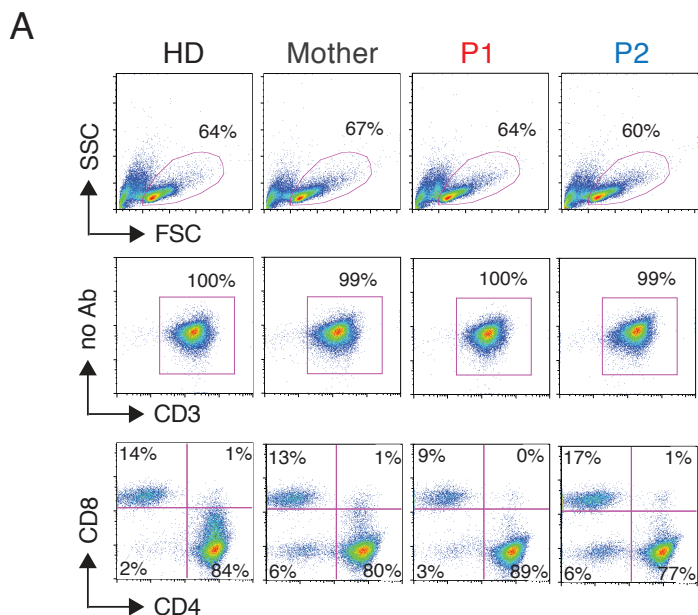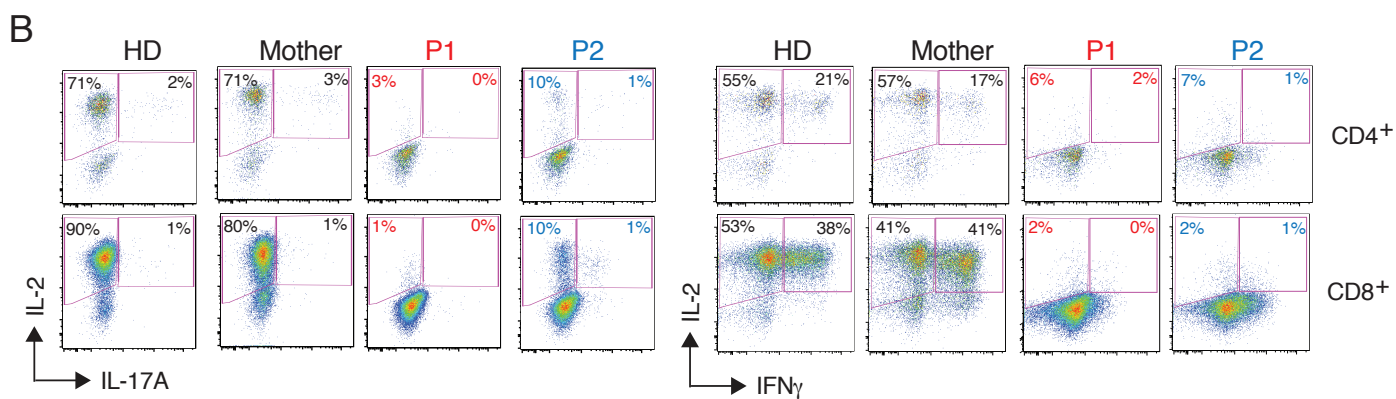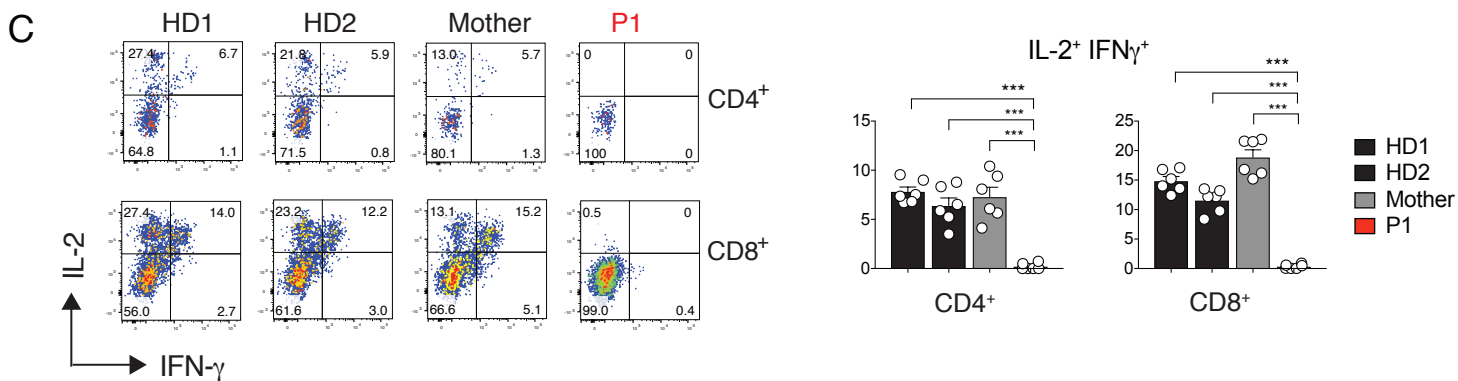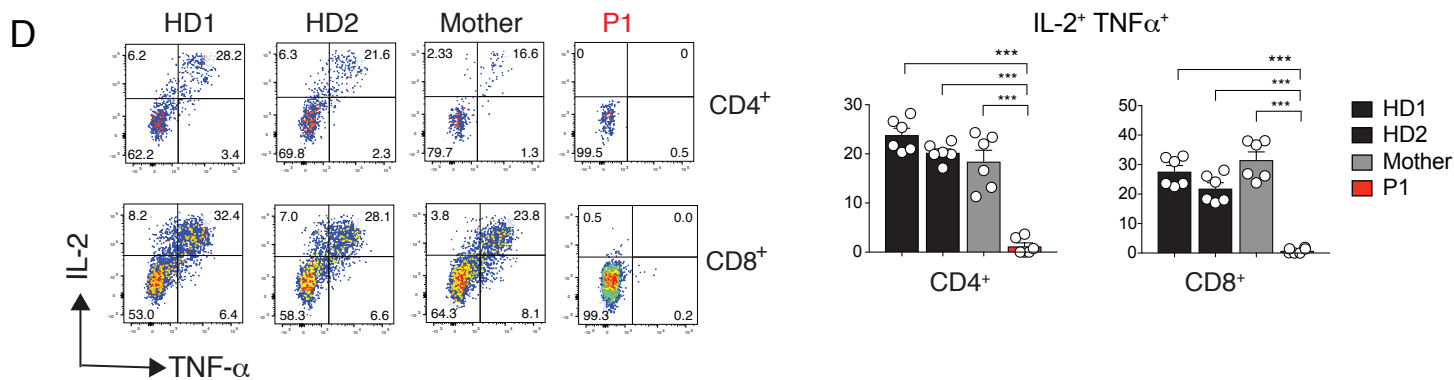

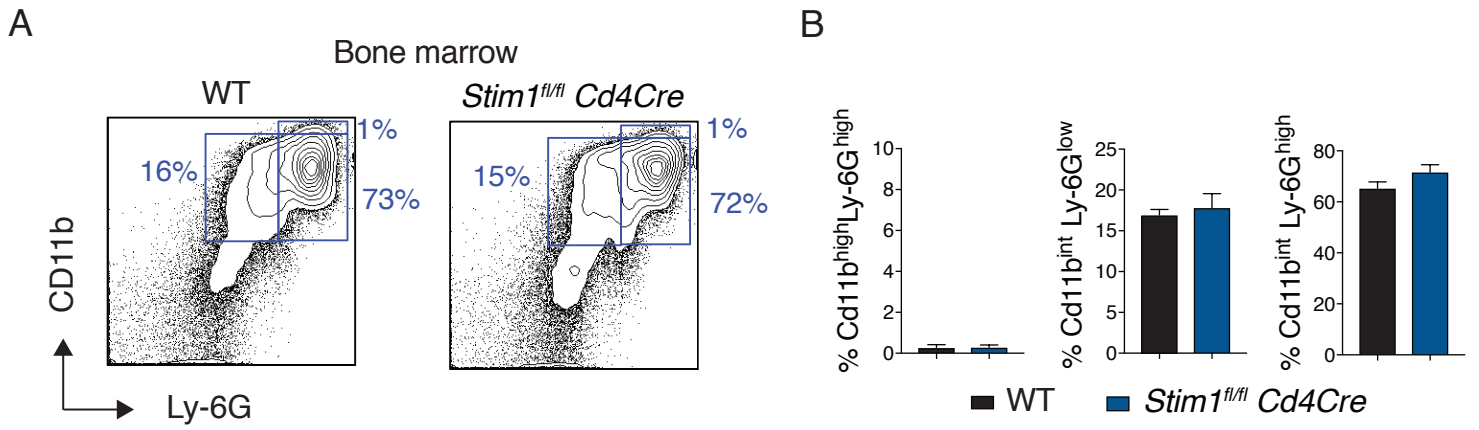

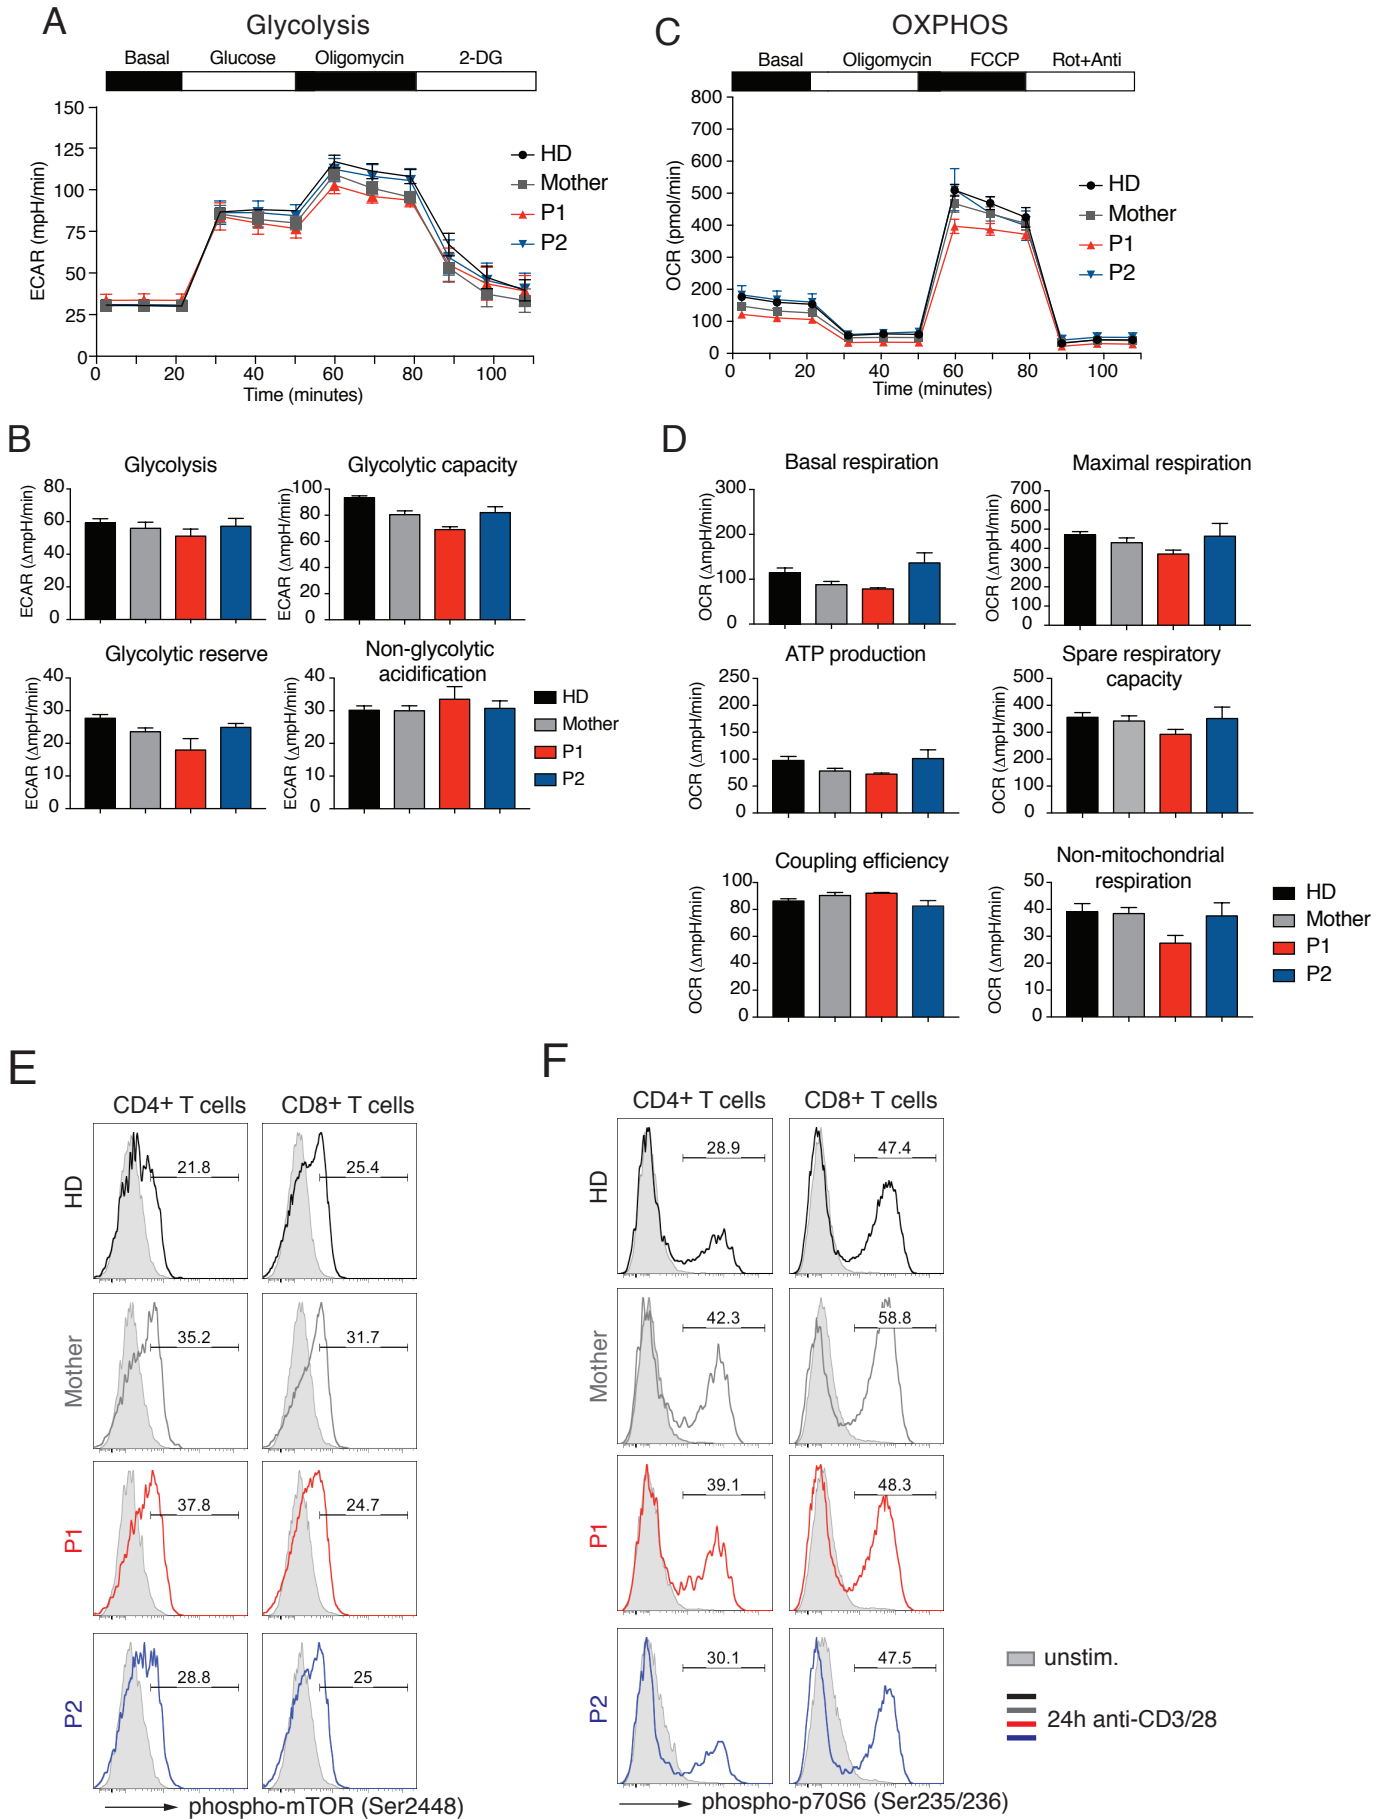

| Figure panel                | Statistical test          | Comparison                 | p value  |
|-----------------------------|---------------------------|----------------------------|----------|
| Figure 1F (AUC)             | Unpaired Student's t-test | HD versus P1               | p<0.0001 |
|                             | Unpaired Student's t-test | HD versus P2               | p<0.0001 |
|                             | Unpaired Student's t-test | Mo versus P1               | p<0.0001 |
|                             | Unpaired Student's t-test | Mo versus P2               | p<0.0001 |
| Figure 1F ( $\Delta$ Peak)  | Unpaired Student's t-test | HD versus P1               | p<0.0001 |
|                             | Unpaired Student's t-test | HD versus P2               | p=0.0026 |
|                             | Unpaired Student's t-test | Mo versus P1               | p<0.0001 |
|                             | Unpaired Student's t-test | Mo versus P2               | p=0.0011 |
| Figure 2F                   | Unpaired Student's t-test | WT versus L374P            | p<0.0001 |
| Figure 2G                   | Unpaired Student's t-test | WT versus L374P            | p<0.0001 |
| Figure 2H                   | Mann Whitney U test       | WT versus L374P            | P=0.0295 |
| Figure 3A (CD3/CD28 -FK506) | Unpaired Student's t-test | HD versus P1               | p=0.0015 |
| Figure 3A (CD3/CD28 -FK506) | Unpaired Student's t-test | HD versus P2               | p=0.0022 |
| Figure 3A (CD3/CD28 -FK506) | Unpaired Student's t-test | Mother versus P1           | p=0.0493 |
| Figure 3B (CD3/CD28 -FK506) | Unpaired Student's t-test | HD versus P1               | p=0.0001 |
| Figure 3B (CD3/CD28 -FK506) | Unpaired Student's t-test | HD versus P2               | p=0.0169 |
| Figure 3B (CD3/CD28 -FK506) | Unpaired Student's t-test | Mother versus P1           | p=0.0111 |
| Figure 4B (CD4+)            | Unpaired Student's t-test | HD1 versus HD1+GSK         | p=0.0004 |
| Figure 4B (CD8+)            | Unpaired Student's t-test | HD1 versus HD1+GSK         | p=0.0474 |
| Figure 4C (CD4+)            | one-way ANOVA.            | HD1 versus P1              | p=0.0125 |
| Figure 4C (CD4+)            | one-way ANOVA.            | HD1 versus HD1+GSK         | p=0.0073 |
| Figure 4C (CD4+)            | one-way ANOVA.            | Mother versus P1           | p=0.0301 |
| Figure 4C (CD8+)            | one-way ANOVA.            | HD1 versus P1              | p<0.0001 |
| Figure 4C (CD8+)            | one-way ANOVA.            | HD1 versus HD1+GSK         | p<0.0001 |
| Figure 4C (CD8+)            | one-way ANOVA.            | HD2 versus P1              | p<0.0001 |
| Figure 4C (CD8+)            | one-way ANOVA.            | HD2 versus HD2+GSK         | p<0.0001 |
| Figure 4D (SOCE)            | Unpaired Student's t-test | HD versus HD+GSK           | p<0.0001 |
| Figure 5A (day 7)           | Unpaired Student's t-test | WT versus Stim1VavCre      | p=0.0002 |
| Figure 5A (day 7)           | Unpaired Student's t-test | WT versus Stim1Stim2VavCre | p<0.0001 |
| Figure 5B                   | Mann Whitney U test       | WT versus Stim1VavCre      | p<0.0001 |
| Figure 5B                   | Mann Whitney U test       | WT versus Stim1Stim2VavCre | p<0.0001 |
| Figure 5E                   | Unpaired Student's t-test | WT versus Stim1VavCre      | P=0.0001 |
| Figure 5E                   | Unpaired Student's t-test | WT versus Stim1Stim2VavCre | p<0.0001 |
| Figure 5G (IL-17A)          | Unpaired Student's t-test | WT versus Stim1VavCre      | p=0.0002 |
| Figure 5G (IL-17A)          | Unpaired Student's t-test | WT versus Stim1Stim2VavCre | p<0.0001 |
| Figure 5G (IFN- $\gamma$ )  | Unpaired Student's t-test | WT versus Stim1VavCre      | p=0.0017 |
| Figure 5G (IFN- $\gamma$ )  | Unpaired Student's t-test | WT versus Stim1Stim2VavCre | p=0.0012 |
| Figure 5G (IL-17F)          | Unpaired Student's t-test | WT versus Stim1VavCre      | n.s.     |
| Figure 5G (IL-17F)          | Unpaired Student's t-test | WT versus Stim1Stim2VavCre | n.s.     |
| Figure 5G (TNF $\alpha$ )   | Unpaired Student's t-test | WT versus Stim1VavCre      | p<0.0001 |
| Figure 5G (TNF $\alpha$ )   | Unpaired Student's t-test | WT versus Stim1Stim2VavCre | p<0.0001 |
| Figure 5G (GM-CSF)          | Unpaired Student's t-test | WT versus Stim1VavCre      | p=0.0002 |
| Figure 5G (GM-CSF)          | Unpaired Student's t-test | WT versus Stim1Stim2VavCre | p<0.0001 |
| Figure 5H                   | Unpaired Student's t-test | WT versus Stim1Mx1Cre      | p=0.0903 |
| Figure 5H                   | Unpaired Student's t-test | WT versus Stim1Stim2Mx1Cre | p<0.0001 |
| Figure 5I                   | Unpaired Student's t-test | WT versus Stim1Mx1Cre      | p=0.0936 |

|                                 |                            |                                              |          |
|---------------------------------|----------------------------|----------------------------------------------|----------|
| Figure 5I                       | Unpaired Student's t-test  | WT versus Stim1Stim2Mx1Cre                   | p=0.0592 |
| Figure 6A (day 7)               | Unpaired Student's t-test  | WT versus Stim1Cd4Cre                        | n.s.     |
| Figure 6B                       | Mann Whitney U test        | WT versus Stim1Cd4Cre                        | n.s.     |
| Figure 6E                       | Log-rank (Mantel-Cox) test | WT versus Stim1Cd4Cre                        | p=0.0392 |
| Figure 6F (day 5,6)             | Unpaired Student's t-test  | WT versus Stim1Cd4Cre                        | p=0.0222 |
| Figure 6H (Liver)               | Mann Whitney U test        | WT (PBS) versus Stim1Cd4Cre (Cand.)          | p=0.0012 |
| Figure 6H (Liver)               | Mann Whitney U test        | Stim1Cd4Cre (PBS) versus Stim1Cd4Cre (Cand.) | p=0.0012 |
| Figure 6H (Kidney)              | Mann Whitney U test        | WT (PBS) versus Stim1Cd4Cre (Cand.)          | p=0.0249 |
| Figure 6H (Kidney)              | Mann Whitney U test        | Stim1Cd4Cre (PBS) versus Stim1Cd4Cre (Cand.) | p=0.0249 |
| Figure 6H (Lung)                | Mann Whitney U test        | WT (PBS) versus Stim1Cd4Cre (Cand.)          | p=0.0047 |
| Figure 6H (Lung)                | Mann Whitney U test        | Stim1Cd4Cre (PBS) versus Stim1Cd4Cre (Cand.) | p=0.0047 |
| Figure 6J (IL-2)                | Unpaired Student's t-test  | WT versus Stim1Cd4Cre                        | p=0.0341 |
| Figure 6J (TNF $\alpha$ )       | Unpaired Student's t-test  | WT versus Stim1Cd4Cre                        | p=0.0268 |
| Figure 6J (IFN $\gamma$ )       | Unpaired Student's t-test  | WT versus Stim1Cd4Cre                        | p=0.0130 |
| Figure 6J (IL-17A)              | Unpaired Student's t-test  | WT versus Stim1Cd4Cre                        | p=0.2840 |
| Figure 6J (GM-CSF)              | Unpaired Student's t-test  | WT versus Stim1Cd4Cre                        | p=0.0282 |
| Figure 6K                       | Unpaired Student's t-test  | WT versus Stim1Cd4Cre                        | p=0.0500 |
| Figure 7C (Il17a)               | Unpaired Student's t-test  | WT versus Stim1Cd4Cre                        | p<0.0001 |
| Figure 7C (Il17f)               | Unpaired Student's t-test  | WT versus Stim1Cd4Cre                        | p=0.0001 |
| Figure 7C (Il22)                | Unpaired Student's t-test  | WT versus Stim1Cd4Cre                        | n.s.     |
| Figure 7C (Il21)                | Unpaired Student's t-test  | WT versus Stim1Cd4Cre                        | p=0.0156 |
| Figure 7C (Csf2)                | Unpaired Student's t-test  | WT versus Stim1Cd4Cre                        | p=0.0243 |
| Figure 7C (Il1r1)               | Unpaired Student's t-test  | WT versus Stim1Cd4Cre                        | p=0.0003 |
| Figure 7C (Il23r)               | Unpaired Student's t-test  | WT versus Stim1Cd4Cre                        | p=0.0028 |
| Figure 8B                       | Unpaired Student's t-test  | WT versus Stim1Cd4Cre                        | p=0.0135 |
| Figure 8C (Glycolysis)          | Unpaired Student's t-test  | WT versus Stim1Cd4Cre                        | p=0.0157 |
| Figure 8C (Glycolytic capacity) | Unpaired Student's t-test  | WT versus Stim1Cd4Cre                        | p=0.0052 |
| Figure 8C (Glycolytic reserve)  | Unpaired Student's t-test  | WT versus Stim1Cd4Cre                        | p=0.0068 |
| Figure 8D (Basal respiration)   | Unpaired Student's t-test  | WT versus Stim1Cd4Cre                        | p=0.0006 |
| Figure 8D (ATP production)      | Unpaired Student's t-test  | WT versus Stim1Cd4Cre                        | p=0.0002 |
| Figure 8D (Maximal respiration) | Unpaired Student's t-test  | WT versus Stim1Cd4Cre                        | p=0.0005 |
| Figure 8D (Coupling efficiency) | Unpaired Student's t-test  | WT versus Stim1Cd4Cre                        | p=0.0005 |
| Figure EV1 Panel C (left)       | Unpaired Student's t-test  | WT Unst vs WT TG                             | p=0.0016 |
| Figure EV1 Panel C (left)       | Unpaired Student's t-test  | $\Delta$ K Unst vs $\Delta$ K TG             | p=0.0007 |
| Figure EV1 Panel C (left)       | Unpaired Student's t-test  | WT Unst vs L374P Unst                        | p=0.0316 |
| Figure EV1 Panel C (left)       | Unpaired Student's t-test  | WT Unst vs L374P- $\Delta$ K Unst            | p=0.0028 |
| Figure EV1 Panel C (left)       | Unpaired Student's t-test  | $\Delta$ K Unst vs L374P- $\Delta$ K Unst    | p=0.0436 |
| Figure EV1 Panel C (right)      | Unpaired Student's t-test  | WT Unst vs WT TG                             | p=0.0057 |
| Figure EV1 Panel C (right)      | Unpaired Student's t-test  | $\Delta$ K Unst vs $\Delta$ K TG             | p=0.0405 |
| Figure EV1 Panel C (right)      | Unpaired Student's t-test  | WT Unst vs L374P Unst                        | p=0.0044 |
| Figure EV1 Panel C (right)      | Unpaired Student's t-test  | WT Unst vs L374P- $\Delta$ K Unst            | p=0.0149 |
| Figure EV1 Panel C (right)      | Unpaired Student's t-test  | $\Delta$ K Unst vs L374P- $\Delta$ K Unst    | p=0.0378 |
| Figure EV1E                     | Paired t-test              | WT Unst versus WT TG                         | p=0.0236 |
| Figure EV1E                     | Paired t-test              | WT Unst versus L374P Unst                    | p=0.0036 |
| Figure EV1E                     | Paired t-test              | L374P Unst versus L374P TG                   | p=0.0067 |
| Figure EV1E                     | Paired t-test              | WT TG versus L374P TG                        | p=0.0131 |
| Figure EV2A (IL-17A)            | Unpaired Student's t-test  | WT versus Stim1Cd4Cre                        | p<0.0001 |

|                        |                           |                       |          |
|------------------------|---------------------------|-----------------------|----------|
| Non-pathogenic         |                           |                       |          |
| Figure EV2A (Il-17A)   | Unpaired Student's t-test | WT versus Stim1Cd4Cre | p=0.0394 |
| Pathogenic             |                           |                       |          |
| Figure EV3 A (Il17a)   | Unpaired Student's t-test | WT versus Stim1Cd4Cre | n.s.     |
| Figure EV3 A (Il17f)   | Unpaired Student's t-test | WT versus Stim1Cd4Cre | n.s.     |
| Figure EV3 A (Il22)    | Unpaired Student's t-test | WT versus Stim1Cd4Cre | n.s.     |
| Figure EV3 A (Il21)    | Unpaired Student's t-test | WT versus Stim1Cd4Cre | n.s.     |
| Figure EV3 A (Csf2)    | Unpaired Student's t-test | WT versus Stim1Cd4Cre | n.s.     |
| Figure EV3 A (Il1r1)   | Unpaired Student's t-test | WT versus Stim1Cd4Cre | p=0.0177 |
| Figure EV3 A (Il23r)   | Unpaired Student's t-test | WT versus Stim1Cd4Cre | n.s.     |
| Figure EV3 B (Il10)    | Unpaired Student's t-test | WT versus Stim1Cd4Cre | n.s.     |
| Non-pathogenic         |                           |                       |          |
| Figure EV3 B (Il10)    | Unpaired Student's t-test | WT versus Stim1Cd4Cre | p=0.0011 |
| Pathogenic             |                           |                       |          |
| Figure EV3 B (Rorc)    | Unpaired Student's t-test | WT versus Stim1Cd4Cre | n.s.     |
| Non-pathogenic         |                           |                       |          |
| Figure EV3 B (Rorc)    | Unpaired Student's t-test | WT versus Stim1Cd4Cre | p=0.0022 |
| Pathogenic             |                           |                       |          |
| Figure EV3 B (Ifng)    | Unpaired Student's t-test | WT versus Stim1Cd4Cre | n.s.     |
| Non-pathogenic         |                           |                       |          |
| Figure EV3 B (Ifng)    | Unpaired Student's t-test | WT versus Stim1Cd4Cre | n.s.     |
| Pathogenic             |                           |                       |          |
| Figure EV3 B (Il4)     | Unpaired Student's t-test | WT versus Stim1Cd4Cre | n.s.     |
| Non-pathogenic         |                           |                       |          |
| Figure EV3 B (Il4)     | Unpaired Student's t-test | WT versus Stim1Cd4Cre | p=0.0062 |
| Pathogenic             |                           |                       |          |
| Figure EV3 B (Il13)    | Unpaired Student's t-test | WT versus Stim1Cd4Cre | n.s.     |
| Non-pathogenic         |                           |                       |          |
| Figure EV3 B (Il13)    | Unpaired Student's t-test | WT versus Stim1Cd4Cre | p=0.0344 |
| Pathogenic             |                           |                       |          |
| Figure EV3 B (Il9)     | Unpaired Student's t-test | WT versus Stim1Cd4Cre | p=0.0223 |
| Non-pathogenic         |                           |                       |          |
| Figure EV3 B (Il9)     | Unpaired Student's t-test | WT versus Stim1Cd4Cre | p=0.0373 |
| Pathogenic             |                           |                       |          |
| Figure EV3 C (Slc2a3)  | Unpaired Student's t-test | WT versus Stim1Cd4Cre | n.s.     |
| Figure EV3 C (Slc2a1)  | Unpaired Student's t-test | WT versus Stim1Cd4Cre | n.s.     |
| Figure EV3 C (Hk1)     | Unpaired Student's t-test | WT versus Stim1Cd4Cre | n.s.     |
| Figure EV3 C (Hk2)     | Unpaired Student's t-test | WT versus Stim1Cd4Cre | n.s.     |
| Figure EV3 C (Aldoa)   | Unpaired Student's t-test | WT versus Stim1Cd4Cre | n.s.     |
| Figure EV3 C (Gpi1)    | Unpaired Student's t-test | WT versus Stim1Cd4Cre | n.s.     |
| Figure EV3 C (Ldha)    | Unpaired Student's t-test | WT versus Stim1Cd4Cre | n.s.     |
| Figure EV3 C (Slc16a1) | Unpaired Student's t-test | WT versus Stim1Cd4Cre | n.s.     |
| Figure EV3 C (Gapdh)   | Unpaired Student's t-test | WT versus Stim1Cd4Cre | n.s.     |
| Figure EV3 C (Pgk1)    | Unpaired Student's t-test | WT versus Stim1Cd4Cre | n.s.     |
| Figure EV3 C (Pfkfb1)  | Unpaired Student's t-test | WT versus Stim1Cd4Cre | n.s.     |
| Figure EV3 C (Pfkfb4)  | Unpaired Student's t-test | WT versus Stim1Cd4Cre | n.s.     |
| Figure EV3 C (Pfkf1)   | Unpaired Student's t-test | WT versus Stim1Cd4Cre | n.s.     |
| Figure EV3 C (Pfkf1)   | Unpaired Student's t-test | WT versus Stim1Cd4Cre | n.s.     |
| Figure EV3 C (Pfkf1)   | Unpaired Student's t-test | WT versus Stim1Cd4Cre | n.s.     |
| Figure EV3 C (Tpi1)    | Unpaired Student's t-test | WT versus Stim1Cd4Cre | n.s.     |
| Figure EV3 C (Pfkf1)   | Unpaired Student's t-test | WT versus Stim1Cd4Cre | n.s.     |
| Figure EV3 C (Pfkf1)   | Unpaired Student's t-test | WT versus Stim1Cd4Cre | n.s.     |
| Figure EV3 C (Pfkf1)   | Unpaired Student's t-test | WT versus Stim1Cd4Cre | n.s.     |

**Appendix Table S3:** Exact p-values for data shown in Figures 1-8 and EV1-4. n.s. = not significant
