# Supplementary material for: STIM1‐mediated calcium influx controls antifungal immunity and the metabolic function of non‐pathogenic Th17 cells
Source: PubMed Central journal article supplement (PMC7411566; doi:10.15252/emmm.201911592), 2020-07-01

Figure 1

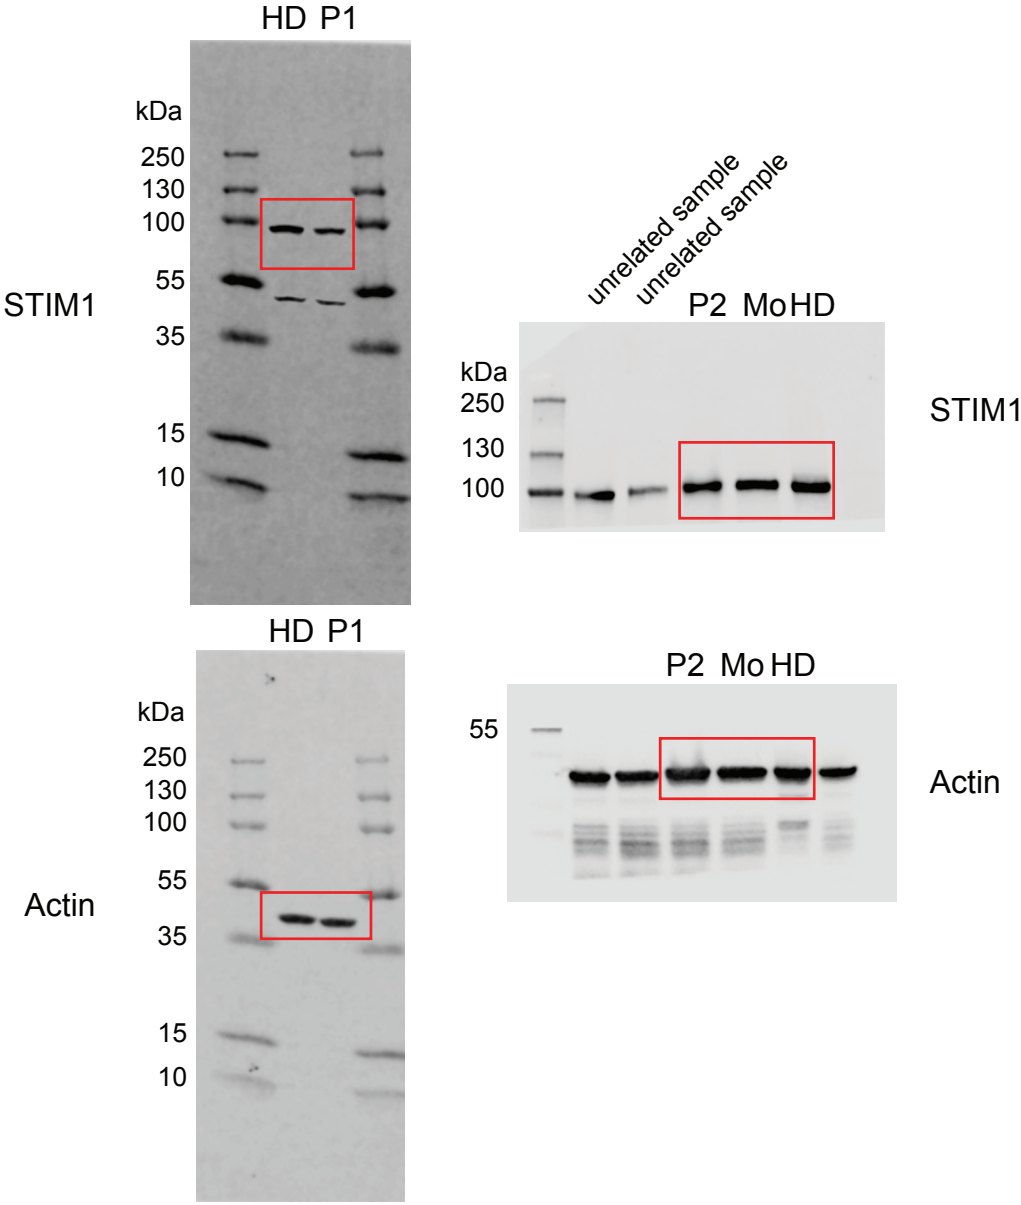

Supplement: EMMM-12-e11592-s004.pdf [file EMMM-12-e11592-s004.pdf]
